# Supplementary material
Source: Springer Nature journal article supplement (https://www.springermedizin.de/resource/supplementary/12882_2014_869_MOESM8_ESM.pdf/9454476)

(A) **Vimentin/PAX2**

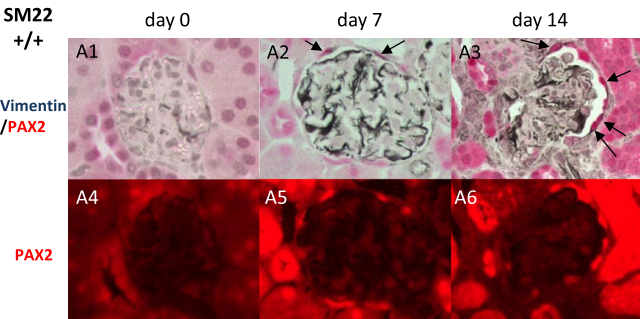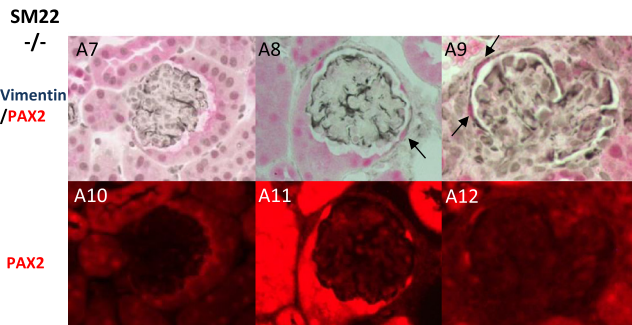

(B)

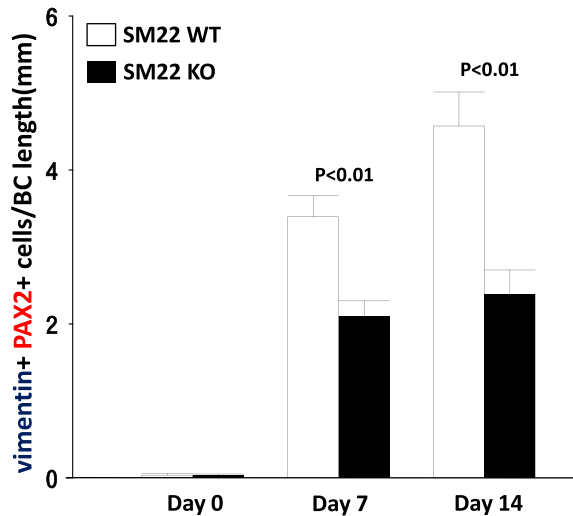

Supplement: MOESM8 [file 9454476]
